# Supplementary material for: Synthesis, crystal structure and biological activity of β-carboline based selective CDK4-cyclin D1 inhibitors
Source: Royal Society of Chemistry journal article supplement (doi:10.1039/b613861f), 2006-01-01
Supplement: b613861f.pdf [file b613861f.pdf]

# Synthesis, crystal structure and biological activity of $\beta$ -carboline based selective CDK4-cyclin D1 inhibitors.

Marcos D. García,<sup>a</sup> A. James Wilson,<sup>a</sup> Daniel P. G. Emmerson,<sup>a</sup> Paul R. Jenkins,<sup>\*a</sup> Sachin Mahale<sup>b</sup> and Bhabatosh Chaudhuri.<sup>b</sup>

5

15

## Electronic Supplementary Data

### Colour Figures

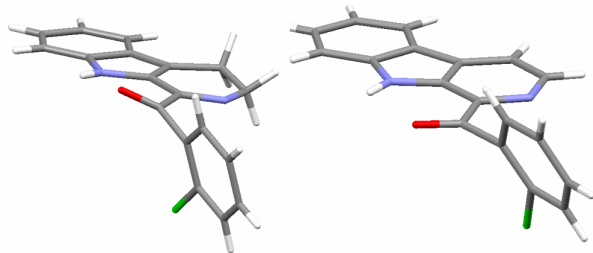

**Fig 2.** MERCURY capped sticks representation of the minimal asymmetric unit in the crystalline structure for compound 3d (left) and 4d (right).

10

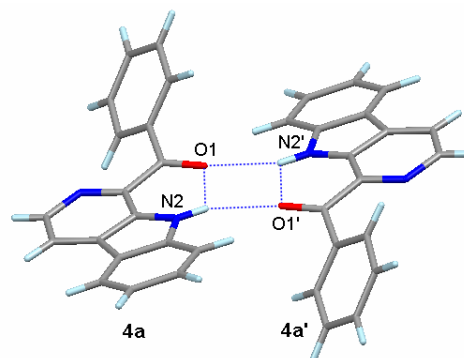

**Fig. 3.** MERCURY capped sticks representation of the cyclic symmetric dimer formed by two molecules of **4a** (symmetry codes  $x,y,z$  and  $-x+1,-y,-z$ ). Intramolecular ( $N2H1\cdots O1$ ,  $N2'H2'\cdots O1$ ) and intermolecular ( $N2H\cdots O1'$ ,  $N2'H\cdots O1$ ) Hydrogen bonds shown as dashed blue lines.

**Table 1.** Geometrical data discussed in the text.

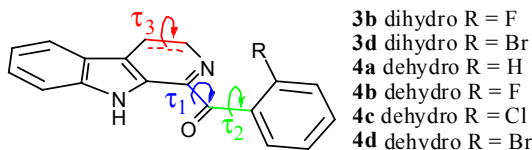

| Structure              | Monomers      |                    |              |              |              |              | Dimers         |                    |                  |
|------------------------|---------------|--------------------|--------------|--------------|--------------|--------------|----------------|--------------------|------------------|
|                        | d(N2..O1) (Å) | $\angle N2HO1$ (°) | $\tau_1$ (°) | $\tau_2$ (°) | $\tau_3$ (°) | d(N1..R) (Å) | d(N2'..O1) (Å) | $\angle N2HO1$ (°) | $^{\circ}di$ (Å) |
| <sup>b</sup> <b>4a</b> | 2.744         | 117.2              | 2.13         | 50.05        | --           | 2.603        | 2.945          | 154.9              | 0.616            |
|                        | 2.767         | 115.7              | 11.78        | -49.70       | --           | 2.567        | 2.944          | 154.2              | 0.616            |
| <b>4b</b>              | 2.889         | 113.4              | -12.54       | -63.18       | --           | 3.099        | 3.056          | 144.4              | 1.095            |
| <b>4c</b>              | 2.808         | 113.9              | -5.70        | -70.49       | --           | 3.262        | 2.996          | 145.6              | 0.275            |
| <b>4d</b>              | 2.813         | 114.2              | -4.11        | -68.10       | --           | 3.351        | 3.013          | 145.0              | 0.000            |
| <b>3b</b>              | 2.837         | 120.5              | 19.90        | 50.34        | -45.53       | 2.939        | ---            | ---                | ---              |
| <b>3d</b>              | 2.935         | 116.6              | -24.94       | -58.96       | -17.30       | 3.361        | 3.088          | 153.8              | 0.770            |

<sup>a</sup> Data measured using the program Mercury. <sup>b</sup> Two different conformers are presented in the asymmetric unit cell for compound **4a**. <sup>c</sup> Perpendicular distance between the parallel planes containing the  $\beta$ -carboline (type **4** compounds) or indolyl (type **3**) moieties of the molecules involved in the double hydrogen bonding.

20

<sup>a</sup> Department of Chemistry, University of Leicester, Leicester, UK LE1 7RH. E-mail: kin@le.ac.uk; Fax: +44(0)116 252 3789; Tel: +44(0)116 252 2124.

<sup>b</sup> School of Pharmacy, De Montfort University, Leicester, UK LE1 9BH. E-mail: bchaudhuri@dmu.ac.uk; Fax: +44(0)116 257 7287; Tel: +44(0)116 250 7280.

25

## Crystal structure determinations<sup>‡</sup>

30 Single crystals of compounds **3b/d** and **4a-d** suitable for X-ray diffractometry were obtained by dissolving crystals of the corresponding pure compound in the minimum quantity of cold EtOH in an open vial that was then placed in a larger container with a little H<sub>2</sub>O in its bottom; the container was closed, and after a few  
35 days in a cool, dark place free from vibrations afforded the desired single crystals. These were mounted in inert oil and transferred to the cold gas stream of the diffractometer.

**Crystal data 3b:** C<sub>18</sub>H<sub>13</sub>FN<sub>2</sub>O, *M* = 292.30, monoclinic, *a* = 11.686(3) Å, *b* = 7.3469(16) Å, *c* = 16.098(4) Å, *U* = 1362.3(5) Å<sup>3</sup>, *T* = 150(2) K, space group P2(1)/n, *Z* = 4, *μ* (Mo-Kα) = 0.099 mm<sup>-1</sup>, 9489 reflections measured, 2402 unique (*R*<sub>int</sub> = 0.0667) which were used in all calculations. The final *wR*(*F*<sup>2</sup>) was 0.937 (all data).

45 **Crystal data 3d:** C<sub>18</sub>H<sub>13</sub>BrN<sub>2</sub>O, *M* = 353.21, monoclinic, *a* = 23.342(4) Å, *b* = 7.5017(14) Å, *c* = 17.360(3) Å, *U* = 2961.3(9) Å<sup>3</sup>, *T* = 150(2) K, space group C2/c, *Z* = 8, *μ* (Mo-Kα) = 2.779 mm<sup>-1</sup>, 10329 reflections measured, 2606 unique (*R*<sub>int</sub> = 0.0481)  
50 which were used in all calculations. The final *wR*(*F*<sup>2</sup>) was 0.964 (all data).

**Crystal data 4a:** C<sub>18</sub>H<sub>11</sub>N<sub>2</sub>O, *M* = 272.30, triclinic, *a* = 6.2230(18) Å, *b* = 13.841(4) Å, *c* = 15.692(5) Å, *U* = 1312.3(7) Å<sup>3</sup>, *T* = 150(2) K, space group P-1, *Z* = 4, *μ* (Mo-Kα) = 0.087 mm<sup>-1</sup>, 9574 reflections measured, 4594 unique (*R*<sub>int</sub> = 0.0501) which were used in all calculations. The final *wR*(*F*<sup>2</sup>) was 1.003 (all data).

**Crystal data 4b:** C<sub>18</sub>H<sub>11</sub>FN<sub>2</sub>O, *M* = 290.29, monoclinic, *a* = 8.6767(12) Å, *b* = 7.7705(11) Å, *c* = 19.715(3) Å, *U* = 1329.0(3) Å<sup>3</sup>, *T* = 150(2) K, space group P2(1)/c, *Z* = 4, *μ* (Mo-Kα) = 1.101 mm<sup>-1</sup>, 9282 reflections measured, 2343 unique (*R*<sub>int</sub> = 0.0845) which were used in all calculations. The final *wR*(*F*<sup>2</sup>) was 1.020 (all data).

65 **Crystal data 4c:** C<sub>18</sub>H<sub>11</sub>ClN<sub>2</sub>O, *M* = 306.74, orthorhombic, *a* = 7.605(2) Å, *b* = 14.272(4) Å, *c* = 26.587(7) Å, *U* = 2885.6(13) Å<sup>3</sup>, *T* = 150(2) K, space group Pbca, *Z* = 8, *μ* (Mo-Kα) = 0.267 mm<sup>-1</sup>, 19314 reflections measured, 2525 unique (*R*<sub>int</sub> = 0.2061) which were used in all calculations. The final *wR*(*F*<sup>2</sup>) was 1.029 (all data).

70 **Crystal data 4d:** C<sub>18</sub>H<sub>11</sub>BrN<sub>2</sub>O, *M* = 351.20, orthorhombic, *a* = 7.5911(12) Å, *b* = 14.524(2) Å, *c* = 26.489(4) Å, *U* = 2920.5(8) Å<sup>3</sup>, *T* = 150(2) K, space group Pbca, *Z* = 8, *μ* (Mo-Kα) = 2.818 mm<sup>-1</sup>, 19679 reflections measured, 2559 unique (*R*<sub>int</sub> = 0.0930) which were  
75 used in all calculations. The final *wR*(*F*<sup>2</sup>) was 0.868 (all data).

## Notes and references

<sup>‡</sup> CCDC621742-CCDC621747 contain, respectively, the supplementary crystallographic data for compounds **3b/d** and  
80 **4a-d** described in this paper. These data can be obtained free of charge from The Cambridge Crystallographic Data Centre via [www.ccdc.cam.ac.uk/data\\_request/cif](http://www.ccdc.cam.ac.uk/data_request/cif).
